# Supplementary material for: Comparative Transcriptome Analysis between Fertile and CMS Flower Buds in Wucai (Brassica campestris L.)
Source: BMC Genomics. 2018 Dec 12;19:908. doi: 10.1186/s12864-018-5331-4 (PMC6292171; doi:10.1186/s12864-018-5331-4)
Supplement: Supplementary file 2 — Table S2. Statistics of annotation results. (XLS 18 kb) [file 12864_2018_5331_MOESM2_ESM.xls]

## Sheet: Table S2
Additional file 2: Table S2. Statistics of annotation results
Sequence File	Nr	NT	Swiss-Prot	KEGG	COG	GO	ALL
All-Unigene	66143	92545	54857	46861	28129	75278	96630
